# Supplementary material for: EHMT2 methyltransferase governs cell identity in the lung and is required for KRAS G12D tumor development and propagation
Source: eLife journal article supplement (doi:10.7554/elife.57648), 2022-08-19
Supplement: supp [file elife_poa_e57648_Supplementary_file_1.docx]

Supplementary Information for

G9a methyltransferase governs cell identity in the lung and is required for KRAS G12D lung tumor development and propagation.

Ariel Pribluda1, Anneleen Daemen2, Anthony Lima1, Xi Wang1, Marc Hafner2, Chungkee Poon3, Zora Modrusan4, Anand Kumar Katakam5, Oded Foreman5, Jeffrey Eastham5, Jefferey Hung5, Benjamin Haley4, Julia T Garcia6, Erica L. Jackson7 and Melissa R. Junttila1.

Departments of 1Translational Oncology, 2Bioinformatics & Computational Biology,

3Immunology, 4Molecular Biology, 5Pathology, Genentech, 1 DNA Way South San Francisco, CA 94080, USA. 6Department of Genetics, Center of Personal Dynamic Regulomes, Stanford, CA, 94305, USA. 7Scorpion Therapeutics, 2 Tower Place, 3rd floor, South San Francisco, CA 94080 USA.

*Current affiliation: Surrozen 171 Oyster point Blvd, #400, South San Francisco, CA, 94080

†Current affiliation: ORIC Pharmaceuticals 240 E. Grand Ave. South San Francisco, CA 94080

Corresponding authors: melissa.junttila@oricpharma.com, ariel@surrozen.com

**This file includes:**

Supplementary File 1

**
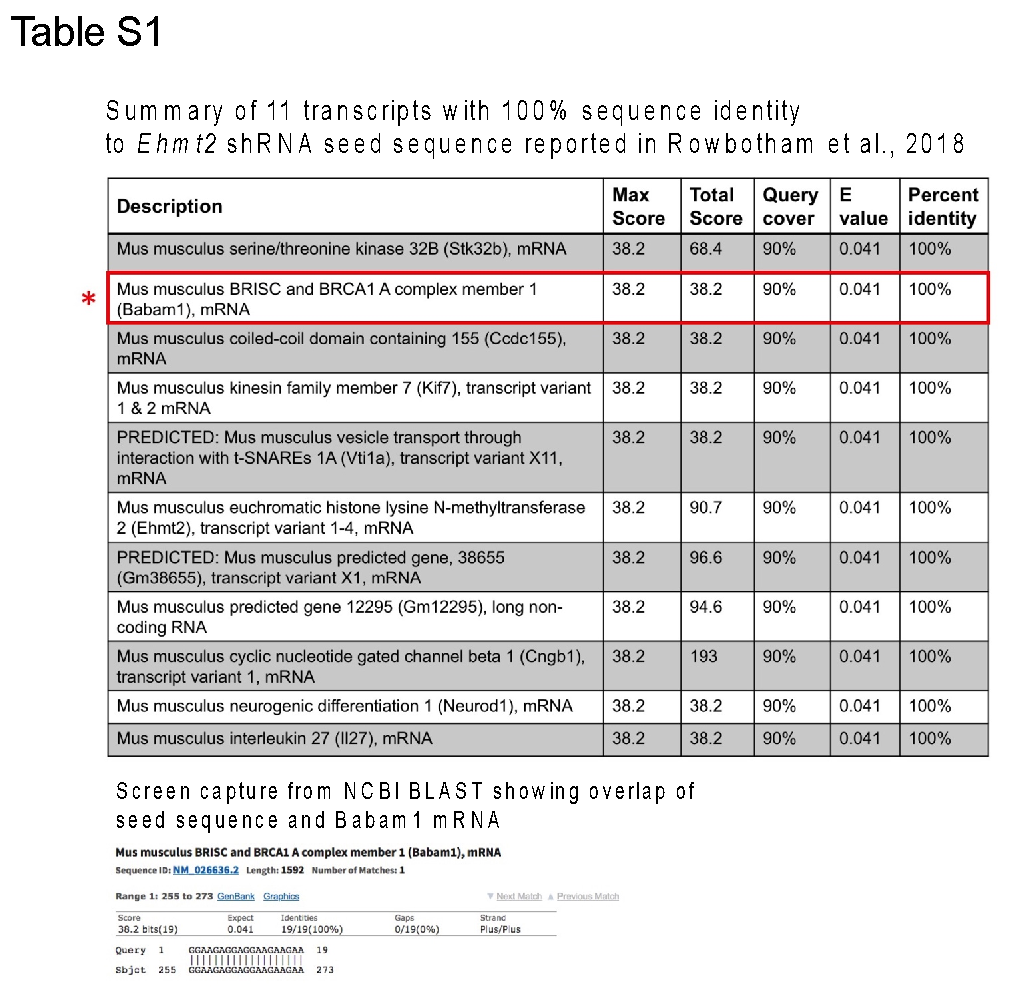
**
