# Supplementary figures and images for: EHMT2 methyltransferase governs cell identity in the lung and is required for KRAS G12D tumor development and propagation
Source: eLife journal article supplement (doi:10.7554/elife.57648), 2022-08-19

## Secondary passaging

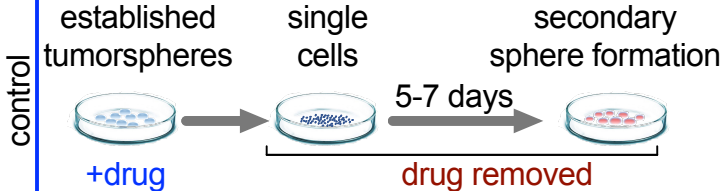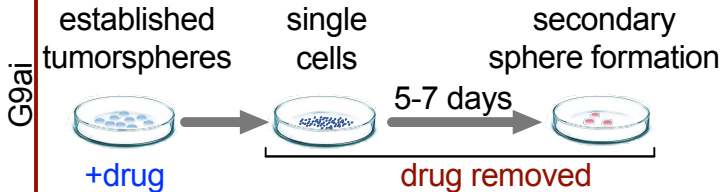

Supplement: supp [file elife_poa_e57648_Figure_1_figure_supplement_1.pdf › elife_poa_e57648_Figure_1_figure_supplement_1.pdf]
